# Supplementary material
Source: Springer Nature journal article supplement (https://www.springermedizin.de/resource/supplementary/12958_2009_557_MOESM3_ESM.pdf/9568298)

A

Control

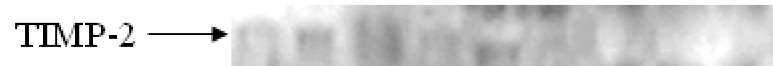

B

Hypertensive Group

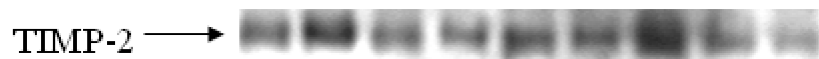

C

O.D. -B ck arbitrary units

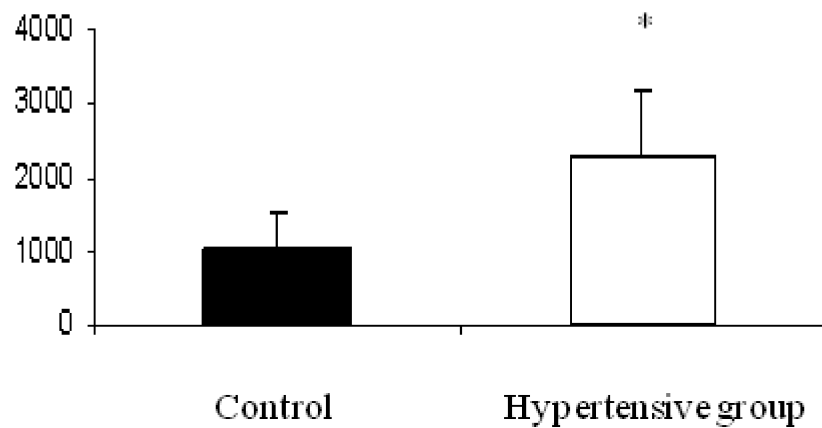

Supplement: MOESM3 [file 9568298]
